CORRECTION

# Correction: Frontal cortex tracks surprise separately for different sensory modalities but engages a common inhibitory control mechanism

The *PLOS Computational Biology* Staff

There is an error within the equation on page 6 of the pdf (under the heading ‘Experimental design and statistical test (EEG analysis)').

Currently the equation reads:

$$\text{Surprise}_i = \log_2 \left( \frac{P_{\text{unexpected\_cue}}(1 \dots n)}{P_{\text{unexpected\_cue}}(1 \dots i - 1)} \right)$$

It should read:

$$\text{Surprise}_i = \log_2 \left( \frac{P_{\text{unexpected\_cue}}(1 \dots i)}{P_{\text{unexpected\_cue}}(1 \dots i - 1)} \right)$$

## Reference

1. Wessel JR, Huber DE (2019) Frontal cortex tracks surprise separately for different sensory modalities but engages a common inhibitory control mechanism. *PLoS Comput Biol* 15(7): e1006927. <https://doi.org/10.1371/journal.pcbi.1006927> PMID: 31356593

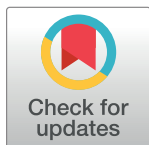

## OPEN ACCESS

**Citation:** The *PLOS Computational Biology* Staff (2019) Correction: Frontal cortex tracks surprise separately for different sensory modalities but engages a common inhibitory control mechanism. *PLoS Comput Biol* 15(10): e1007420. <https://doi.org/10.1371/journal.pcbi.1007420>

**Published:** October 7, 2019

**Copyright:** © 2019 The PLOS Computational Biology Staff. This is an open access article distributed under the terms of the [Creative Commons Attribution License](https://creativecommons.org/licenses/by/4.0/), which permits unrestricted use, distribution, and reproduction in any medium, provided the original author and source are credited.
